# Supplementary material for: CRISPR/Cas9-Induced Inactivation of the Autism-Risk Gene setd5 Leads to Social Impairments in Zebrafish
Source: MDPI journal article supplement (doi:10.3390/ijms24010167), 2022-12-22
Supplement: s1 [file s1]

## SUPPLEMENTARY MATERIALS

**Table S1.** Primers used in RT-qPCR or PCR

| Primers            | Forward (5'-3')           | Reverse (5'-3')          |
|--------------------|---------------------------|--------------------------|
| <i>setd5</i>       | GCATAGTGCTGTTCCCCCTT      | CAGGGGCGTTGGTTTTTGT      |
| <i>setd5 WT</i>    | CACCACTCCCAAAGCCAAGA      | GGTCCGTCCATTGCCGAATT     |
| <i>setd5 MUT</i>   | CACCACTCCCAAAGCCAAGA      | CATACTGGTCCGTCCATTTCG    |
| <i>b-actin1</i>    | CGAGCAGGAGATGGGAACC       | CAACGGAAACGCTCATTGC      |
| <i>elavl3</i>      | AGACAAGATCACAGGCCAGAGCTT  | TGGTCTGCAGTTTGAGACCGTTGA |
| <i>homer1b-202</i> | TCCAGAGCCGCTTCATTTCAG     | CTGCTCCCCCATGTTGCTG      |
| <i>sypa</i>        | GCAAATCAGTTGGTTGCCCA      | TTCTTGCACTCCACGCTCAT     |
| <i>sypb</i>        | CGTTCAGACTGCACCAGGTAT     | CAGAAAGAGTCGCTCGGGTT     |
| <i>gad2</i>        | AAGCAGAAGGGATACGTGCC      | CCGGTGTTCGCGGACATTA      |
| <i>gad1a</i>       | CCATACAGTGTGGCCGTCAT      | CATTTGTGTGCTGTGGCTCC     |
| <i>gad1b</i>       | ATATTCCACCGAGTCTGCGT      | TGCCGCACTCCATCATCATT     |
| <i>th1</i>         | GACGGAAGATGATCGGAGACA     | CCGCCATGTTCCGATTCT       |
| <i>th2</i>         | CTCCAGAAGAGAATGCCACATG    | ACGTTCACTCTCCAGCTGAGTG   |
| <i>slc6a3/dat</i>  | CGTCACCAACGGTGGAATCTA     | TGCCGATGGCCTCAATTAGTA    |
| <i>dbh</i>         | TGCAACCAGTCCACAGCGCA      | GCTGTCCGCTCGCACCTCTG     |
| <i>ddc</i>         | CAAAGGAGGTGGGGTCATCC      | CACCGATGAGTGTGCCTGAT     |
| <i>serta</i>       | ACAACCGATGGAACACTCCC      | CAACACCTGCCGGACATAAA     |
| <i>sertb</i>       | AGGAGACCAGCGTATGGGTA      | GGGATTGTAGCTGGACAGGG     |
| <i>tph1a</i>       | CTGCCTGAGGAAAGCGAGAT      | CATACATCAGCACGCGGTTC     |
| <i>tph1b</i>       | CTAAGAGCATACGGGGCTGG      | GGACGCTGGATTGTCTTTGC     |
| <i>tph2</i>        | GGGCTGTGCAAACAAGATGG      | CTCCTGGTAGCACGTGGTTT     |
| <i>vmat2</i>       | TGGAGCTCTGCAGCTTTTTGTGC   | AACGCCGGCTCCAGCATAGC     |
| <i>hdc</i>         | TTCATGCGTCCTCTCCTGC       | CCCCAGGCATGATGATGTTC     |
| <i>setd2</i>       | TGGATGCTCTGTTGAATCCTGA    | AGACCTTCTGTGACCCCTGT     |
| <i>mll5</i>        | AGCCTTCAAGCCACCTGTAG      | ACCTTCCCCCTGTACTCGAT     |
| <i>shank3a</i>     | GGCACTTATTACGCTGCTGGATCTG | CATGACGGCAAGCCTGGTGAAT   |
| <i>shank3b</i>     | CGGCCGTGGCAACAACAC        | TTAAGCACATCGGTCAGGCTTTGT |
| <i>mecp2</i>       | ACGTCTACCTTATCAACCCAGA    | CCTTCCACGTCCAGAGGG       |
| <i>nrxn1a</i>      | GATGCAGTGCTGGTTAGGGT      | ATGTCATCGGTGCCACATT      |

|                   |                        |                      |
|-------------------|------------------------|----------------------|
| <i>nrxn1b</i>     | GGGGGACTACCTCAAACCTGC  | TCAATAACCGGCAGGTCGTC |
| <i>PSD95/dlg4</i> | CACCTGTCTTCTCTCTGCCA   | ATGGCCGCCAGGTTCTTATC |
| <i>syn1</i>       | CGCAGCTTAACAAATCCCAGT  | ATGGTCTCAGCCTTGGCTTC |
| <i>nsd1a-201</i>  | CAAGGGCTATCCGGTGGTTC   | TTCGGACATCAAGAGCCCTG |
| <i>nsd1b-201</i>  | TCAAAGGCTCACTCATCCCTG  | TATTTCACTGGCGGTAGAGC |
| <i>nsd1b-202</i>  | TCACAAAATGAAAGAGCCACCA | CGCTTGGGTATCTGCAAAGC |

**Table S2.** Primers used in Melting analysis

| Primers      | Forward (5'-3')      | Reverse (5'-3')      |
|--------------|----------------------|----------------------|
| <i>setd5</i> | ACTCTGCGTCAGAGACCAGT | GGAGGGTCTGTACATCAGCG |

**Table S3.** Primers used to generate PCR amplicons to be sequenced by the Sanger method

| Primers             | Forward (5'-3')           | Reverse (5'-3')          |
|---------------------|---------------------------|--------------------------|
| <i>setd5</i>        | GCAATGATGCCTTTTGTACACCAT  | TGTTCTGTTTGTCTTTTGTGCTAT |
| <i>Off target_1</i> | AGGGCTGCCTGAAAACTTCT      | CCCTTCCCCTTTTCTGAAAGTC   |
| <i>Off target_2</i> | AGCAACGGGTTTACTTGCTT      | CTCTGGGAGCTGTCAGTGTG     |
| <i>Off target_3</i> | CAGCCTCTTCTGTTATCAATTAGGT | AGGGGATCCTTGATGGGTGA     |
| <i>Off target_4</i> | TGGCAAAGGTTATACAGTGGGAA   | GACAGTGGAAAATGCAACGTCA   |

**Table S4.** Sequencing primers for PCR amplicons

| Primers             | Sequences (5'-3') |                      |
|---------------------|-------------------|----------------------|
| <i>setd5</i>        | <b>Rv</b>         | TCTGTTTGTCTTTTGTGCTG |
| <i>Off target_1</i> | <b>Rv</b>         | AGATAGACTGGGCGATTG   |
| <i>Off target_2</i> | <b>Fw</b>         | AGCAACGGGTTTACTTGC   |
| <i>Off target_3</i> | <b>Fw</b>         | CTTTGGATGCCAACAATG   |
| <i>Off target_4</i> | <b>Fw</b>         | TGCCATTTCATCCTTGCAG  |

## SUPPLEMENTARY FIGURES

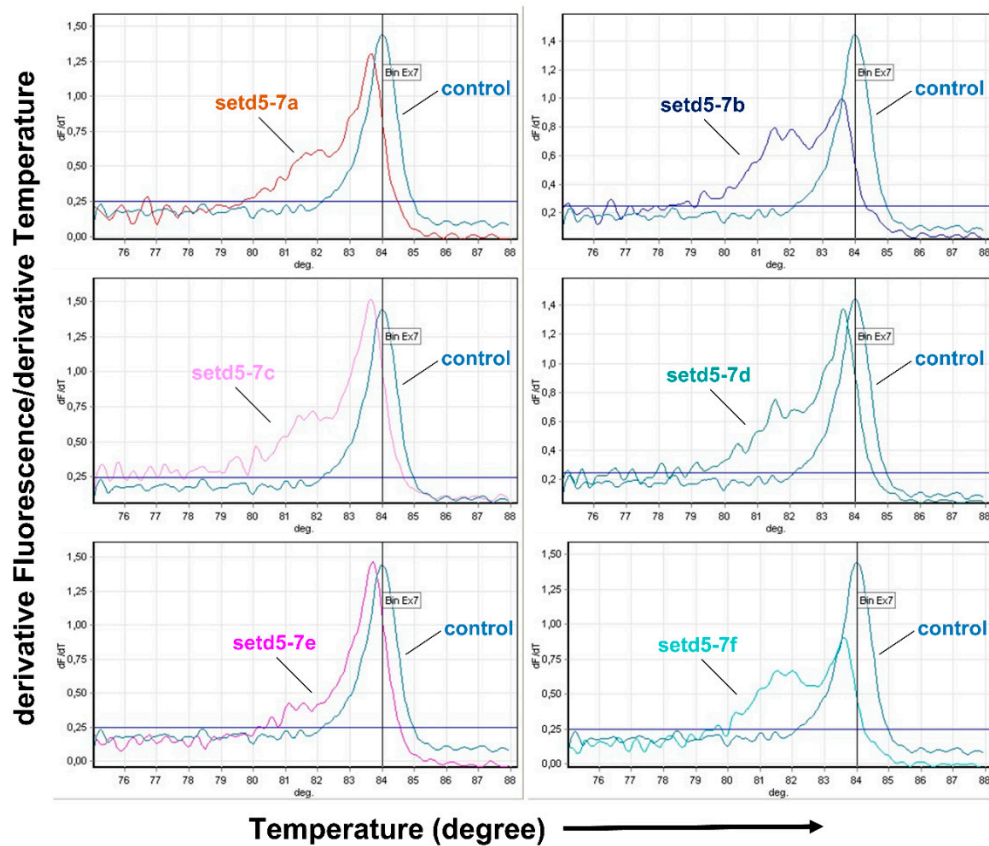

**Figure S1: Efficiency of CRISPR/Cas9 gene editing system targeting *setd5* in zebrafish.** Melting analysis of 6 representative zebrafish embryos injected with gRNA targeting a sequence encoding the Exon 7 of *setd5* gene along with zebrafish codon optimized mRNA encoding Cas9 endonuclease. Uninjected wild type *setd5* embryos were used as control.

(a)

WILD TYPE GATGAGAACACAACCGAAGGGTGGGAGACACGAATTCGGCAATGGA  
 $\Delta 8$  allele GATGAGAACACAACCGAAGGGTGGGAGACACGAA-----TGA

(b)

$\Delta 8$  allele translation

gatgagaacacaacccaagggtgggagacacgaatggacggaccagta tga  
 D E N T T E G W E T R M D G P V -

**Figure S2: Sequence of frameshift mutation in *setd5* allele transmitted by CRISPR/Cas9-injected zebrafish founder. (a)** Partial sequence of Exon 7 of *setd5* gene, including the guide RNA sequence (in green), the PAM sequence (in red), aligned with the sequence of mutated *setd5* gene ( $\Delta 8$  *setd5*) lacking the 8 nucleotides underlined in the wild type sequence. **(b)** Putative appearance of a premature stop codon during translation of  $\Delta 8$  *setd5* allele.

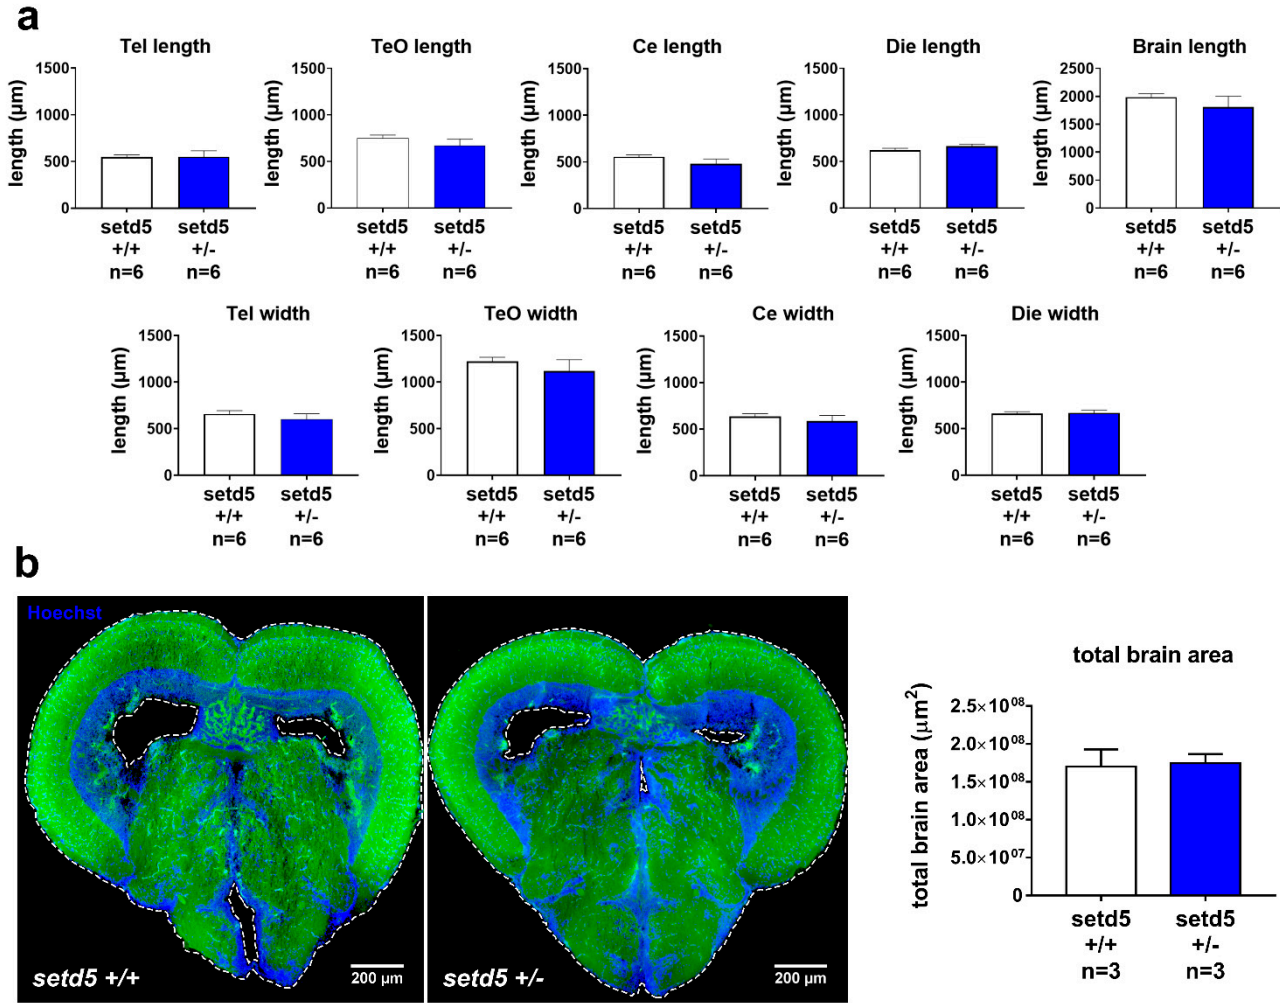

**Figure S3: Morphometrical analysis of brain regions from mutant *setd5* zebrafish adults. (a)** Absolute Telencephalon (Tel) length and width, Optic tectum (TeO) length and width, Cerebellum (Ce) length and width, Diencephalon (Die) length and width and total brain length from 10-month-old *setd5*<sup>+/+</sup> and *setd5*<sup>+/-</sup> zebrafish adults. **(b)** Representative images and quantification of central nervous system area from coronal sections from 10-month-old *setd5*<sup>+/+</sup> and *setd5*<sup>+/-</sup> adult zebrafish brains. Hoechst counter-staining in blue. Sections 12 μm-thick. 40X magnification. **(a, b)** n=number of adult brains analyzed. Data are expressed as mean ± SEM. Statistical analysis was performed using **(a)** Student t-test or **(b)** Mann-Whitney test.

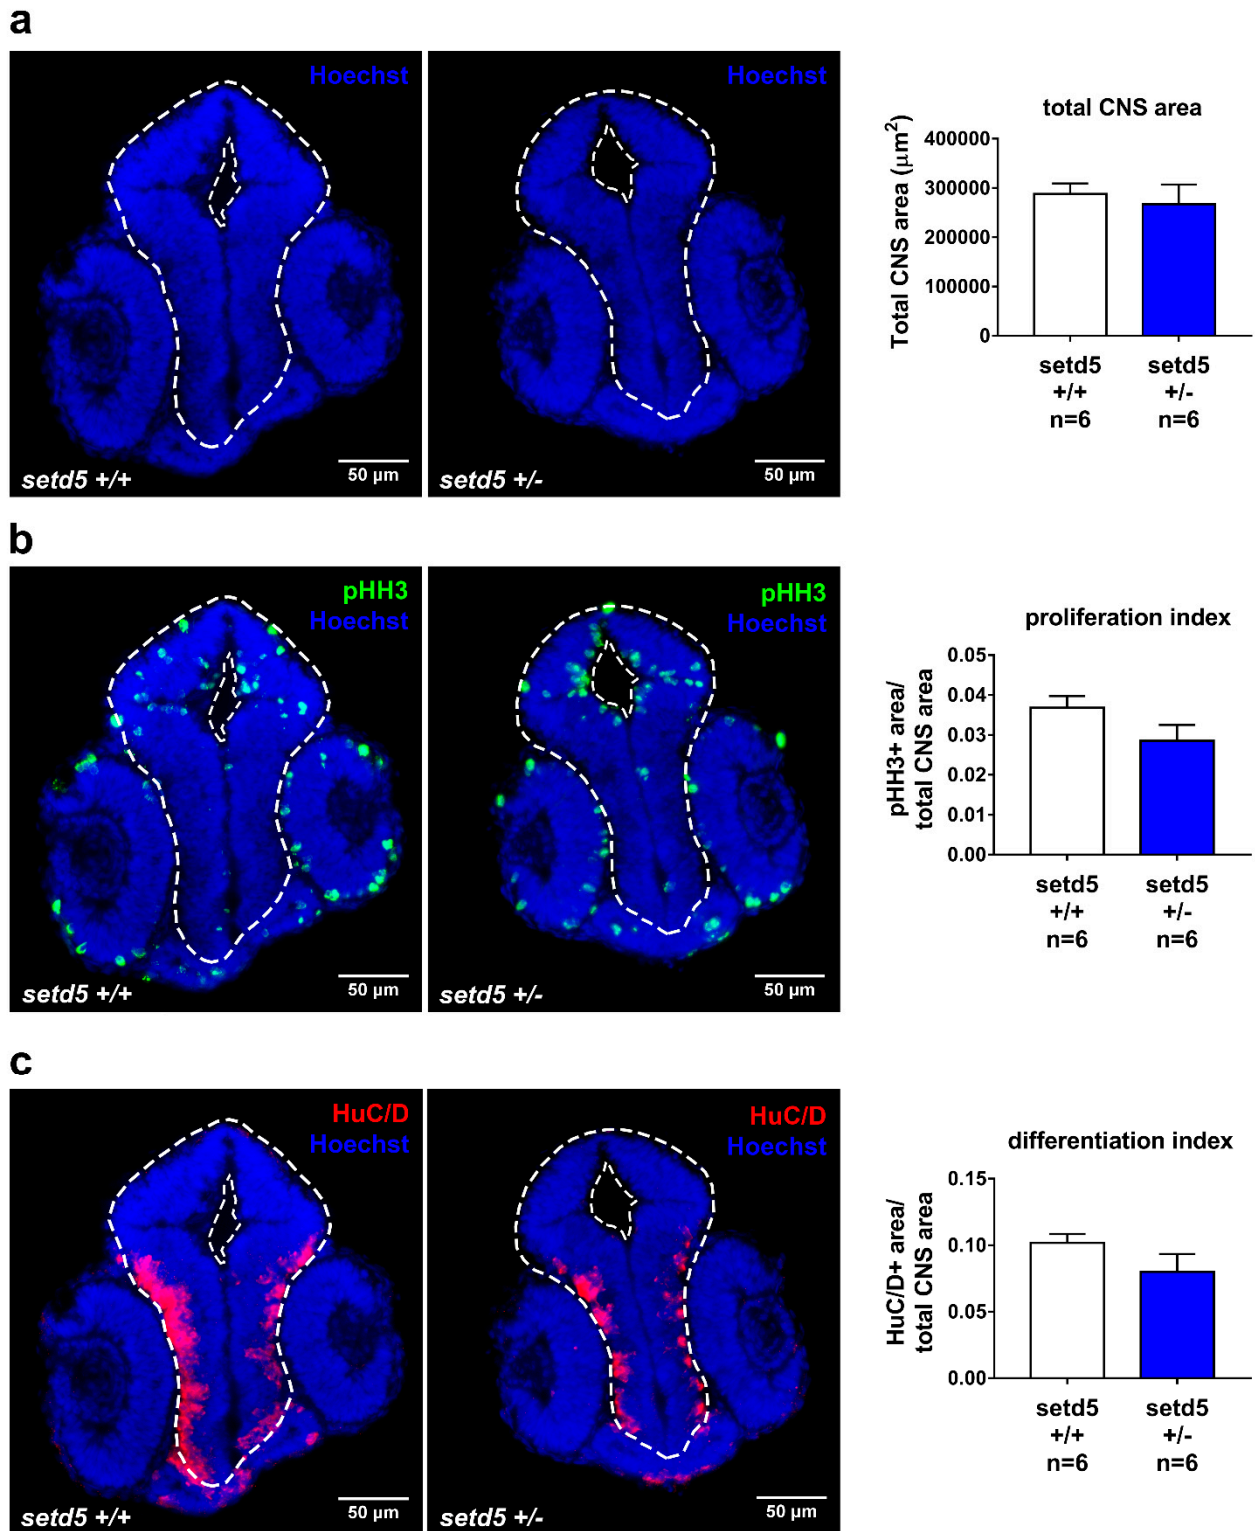

**Figure S4: Evaluation of proliferation and differentiation index in developing central nervous system of mutant *setd5* embryos.** (a-c) Representative images and quantification of (a) developing central nervous system (CNS) area, immunofluorescence for (b) proliferation marker histone H3 phosphorylated in Ser-10 (pHH3) in green and (c) neural differentiation marker HuC/D in red on

coronal sections of CNS of 24 hpf embryos. (a-c) Hoechst counter-staining in blue was used to obtain total CNS area. Sections 12  $\mu$ m-thick. 40X magnification. n=number of embryos analyzed. Data are expressed as mean  $\pm$  SEM. Statistical analysis was performed using Student's *t*-test.

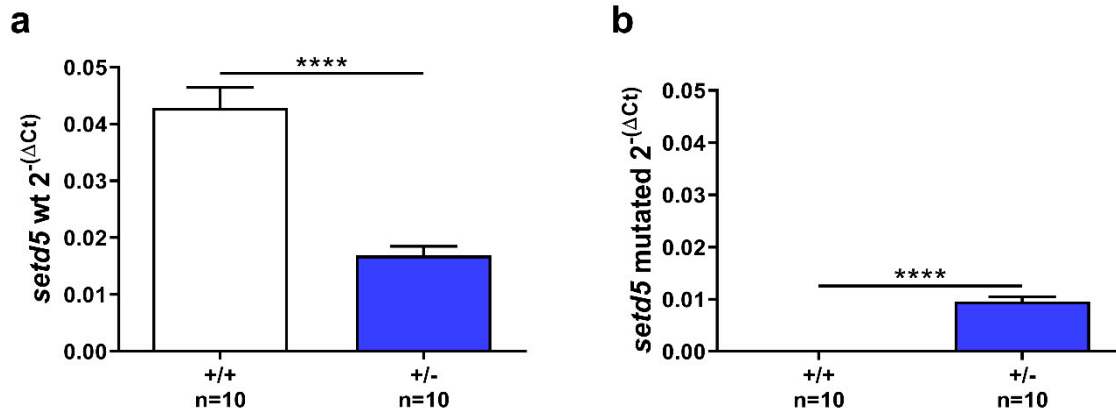

**Figure S5: Expression of *setd5* in mutant *setd5* adult zebrafish brains. (a,b)** Expression of wild type *setd5* (a) and the mutant *setd5* (b) in *setd5*+/+ and *setd5*+/- adult zebrafish brains, obtained by RT- qPCR analysis. The values are expressed as  $2^{-\Delta Ct}$ , using *b-actin1* as the housekeeping gene. n=number of adult brains analyzed. Data are expressed as mean  $\pm$  SEM. Statistical analysis was performed using Student's *t*-test. \*\*\*\*p < 0.0001.

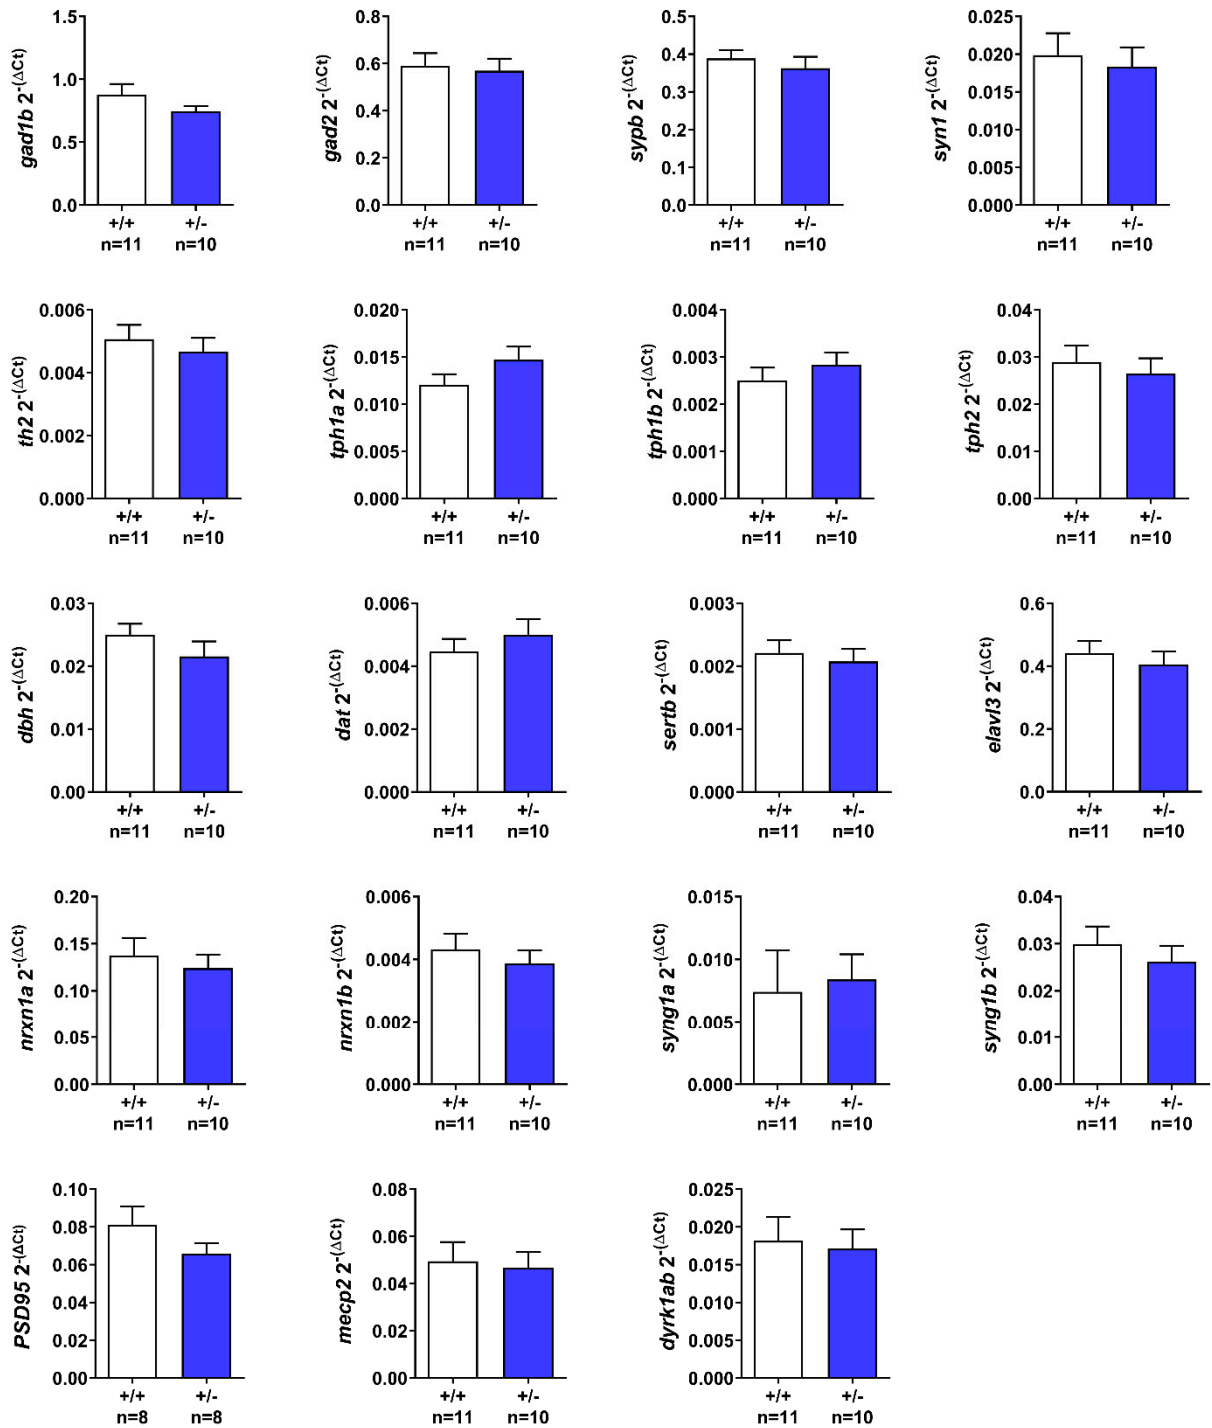

**Figure S6: Expression of different genes encoding for regulators of different neurotransmitter pathways in mutant *setd5* adult zebrafish brains.** Expression of different genes encoding for regulators of different neurotransmitter pathways and proteins involved in neuronal activity in *setd5*<sup>+/+</sup> and *setd5*<sup>+/-</sup> adult zebrafish brains, obtained by RT- qPCR analysis. The values are

expressed as  $2^{-(\Delta C_t)}$ , using *b-actin1* as the housekeeping gene. n=number of adult brains analyzed. Data are expressed as mean  $\pm$  SEM. Statistical analysis was performed using Student's *t*-test test.
